# Supplementary material for: A novel ruthenium(ii) gallic acid complex disrupts the actin cytoskeleton and inhibits migration, invasion and adhesion of triple negative breast tumor cells
Source: Royal Society of Chemistry journal article supplement (doi:10.1039/d0dt03490h), 2020-11-25
Supplement: d0dt03490h1.pdf [file d0dt03490h1.pdf]

## **SUPPLEMENTARY MATERIAL**

### **A novel ruthenium(II) gallic acid complex disrupts the actin cytoskeleton and inhibits migration, invasion and adhesion of Triple Negative Breast Tumor Cells**

Angelica E. Graminha<sup>a,c</sup>, João Honorato<sup>a</sup>, Rodrigo S. Correa<sup>b</sup>, Marcia R. Cominetti<sup>c</sup>, Antônio C. S.  
Menezes<sup>d</sup>, Alzir A. Batista<sup>a</sup>

<sup>a</sup> Departamento de Química, Universidade Federal de São Carlos – UFSCar, Rodovia Washington Luís Km 235, CP 676, 13561-901, São Carlos, SP, Brazil

<sup>b</sup> Departamento de Química, Universidade Federal de Ouro Preto (UFOP), CP: 35.400-000, Ouro Preto MG, Brazil

<sup>c</sup> Departamento de Gerontologia, Universidade Federal de São Carlos – UFSCar, Rodovia Washington Luís Km 235, CP 676, 13561-901, São Carlos, SP, Brazil

<sup>d</sup> Centro de Ciências Exatas e de Tecnologia, Universidade Estadual de Goiás – UEG, BR 153, CP 459, 75132-903, Anápolis, GO, Brazil

Corresponding authors: Angelica E. Graminha ([aegraminha@gmail.com](mailto:aegraminha@gmail.com)) and Alzir A. Batista ([daab@ufscar.br](mailto:daab@ufscar.br)). Tel.:

+55 1633518285; Fax: +55 1633518350.

**Table 1S.** Infrared assignments ( $\text{cm}^{-1}$ ) of symmetric (vs) and asymmetric (vas) stretching of carboxyl group in free and coordinated ligand.

| Compound  | $\nu_{\text{as}}\text{COO}^-$ | $\nu_{\text{s}}\text{COO}^-$ | $\Delta(\text{cm}^{-1})$ |
|-----------|-------------------------------|------------------------------|--------------------------|
| HBAC      | 1688                          | 1453                         | 235                      |
| HGAC      | 1666                          | 1468                         | 198                      |
| HEGA      | 1697                          | 1432                         | 265                      |
| [Ru(BAC)] | 1619                          | 1499                         | 120                      |
| [Ru(GAC)] | 1622                          | 1497                         | 125                      |
| [Ru(EGA)] | 1624                          | 1512                         | 112                      |

**Table 2S.** Crystallographic data and structures refinement for **Ru(BAC)** and **Ru(EGA)**.

|                                      | <b>Ru(BAC)</b>                                                                                                                                           | <b>Ru(EGA)</b>                                                                                                                         |
|--------------------------------------|----------------------------------------------------------------------------------------------------------------------------------------------------------|----------------------------------------------------------------------------------------------------------------------------------------|
| Empirical formula                    | $\text{C}_{90} \text{H}_{83} \text{F}_{12} \text{N}_4 \text{O}_{4.50} \text{P}_6 \text{Ru}_2$                                                            | $\text{C}_{51} \text{H}_{47.50} \text{F}_6 \text{N}_2 \text{O}_{8.25} \text{P}_3 \text{Ru}$                                            |
| Formula weight                       | 1908.56                                                                                                                                                  | 1128.39                                                                                                                                |
| Temperature                          | 293(2) K                                                                                                                                                 | 293(2) K                                                                                                                               |
| Wavelength                           | 0.71073 Å                                                                                                                                                | 0.71073 Å                                                                                                                              |
| Crystal system                       | Triclinic                                                                                                                                                | Monoclinic                                                                                                                             |
| Space group                          | P -1                                                                                                                                                     | P2 <sub>1</sub> /a                                                                                                                     |
| Unit cell dimensions                 | a = 11.7551(2) Å<br>$\alpha = 110.1960(10)^\circ$<br>b = 17.4930(4) Å<br>$\beta = 97.4780(10)^\circ$<br>c = 22.9633(4) Å<br>$\gamma = 99.2730(10)^\circ$ | a = 18.6440(6) Å<br>$\alpha = 90^\circ$<br>b = 31.0250(8) Å<br>$\beta = 110.1340(10)^\circ$<br>c = 19.4890(7) Å<br>$\gamma = 90^\circ$ |
| Volume                               | 4284.88(15) Å <sup>3</sup>                                                                                                                               | 10584.1(6) Å <sup>3</sup>                                                                                                              |
| Z                                    | 2                                                                                                                                                        | 8                                                                                                                                      |
| Density (calculated)                 | 1.479 Mg/m <sup>3</sup>                                                                                                                                  | 1.416 Mg/m <sup>3</sup>                                                                                                                |
| Absorption coefficient               | 0.545 mm <sup>-1</sup>                                                                                                                                   | 0.461 mm <sup>-1</sup>                                                                                                                 |
| F(000)                               | 1946                                                                                                                                                     | 4612                                                                                                                                   |
| Crystal size                         | 0.20 x 0.40 x 0.40 mm <sup>3</sup>                                                                                                                       | 0.12 x 0.13 x 0.34 mm <sup>3</sup>                                                                                                     |
| Theta range for data collection      | 3.017 to 26.093°                                                                                                                                         | 1.292 to 25.598°                                                                                                                       |
| Index ranges                         | -14 ≤ h ≤ 14, -21 ≤ k ≤ 21, -28 ≤ l ≤ 28                                                                                                                 | -17 ≤ h ≤ 22, -37 ≤ k ≤ 35, -23 ≤ l ≤ 15                                                                                               |
| Reflections collected                | 72618                                                                                                                                                    | 45924                                                                                                                                  |
| Independent reflections              | 16813 [R(int) = 0.0777]                                                                                                                                  | 18766 [R(int) = 0.0638]                                                                                                                |
| Completeness to theta                | (25.242) 98.9 %                                                                                                                                          | (25.242°) 95.1 %                                                                                                                       |
| Refinement method                    | Full-matrix least-squares on F <sup>2</sup>                                                                                                              | Full-matrix least-squares on F <sup>2</sup>                                                                                            |
| Data / restraints / parameters       | 16813 / 0 / 1072                                                                                                                                         | 18766 / 0 / 1265                                                                                                                       |
| Goodness-of-fit on F <sup>2</sup>    | 1.023                                                                                                                                                    | 0.967                                                                                                                                  |
| Final R indices [ $I > 2\sigma(I)$ ] | R1 = 0.0597, wR2 = 0.1599                                                                                                                                | R1 = 0.0780, wR2 = 0.1946                                                                                                              |
| R indices (all data)                 | R1 = 0.0931, wR2 = 0.1815                                                                                                                                | R1 = 0.1657, wR2 = 0.2515                                                                                                              |
| Largest diff. peak and hole          | 1.009 and -0.800 e.Å <sup>-3</sup>                                                                                                                       | 0.869 and -0.995 e.Å <sup>-3</sup>                                                                                                     |

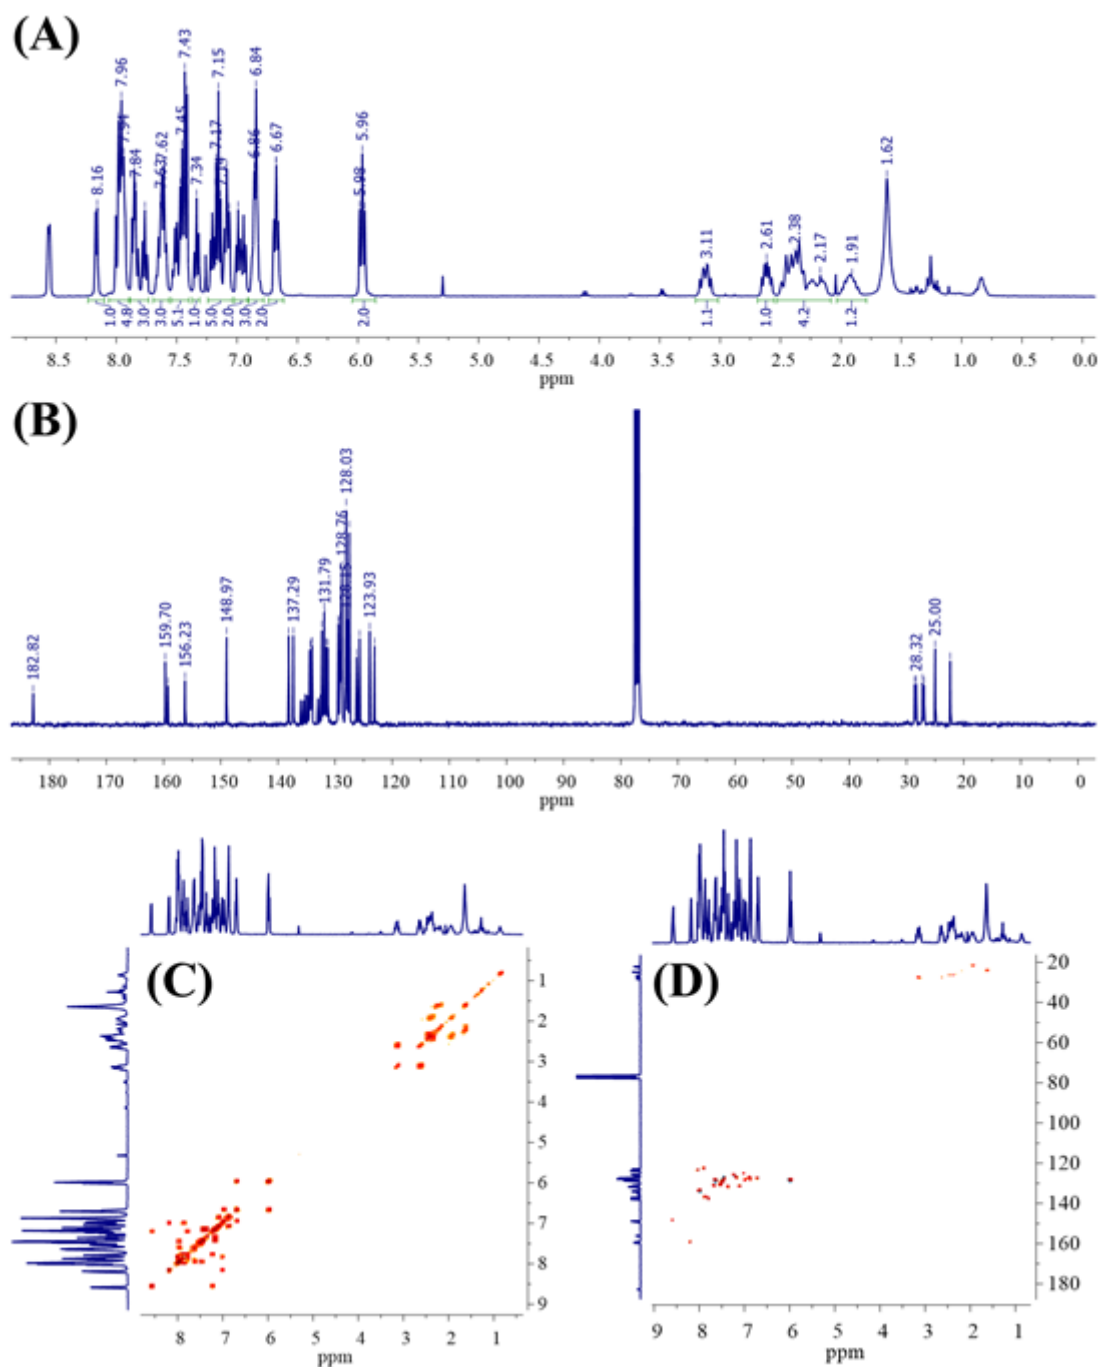

**Figure 1S:**  $^1\text{H}$  (A),  $^{13}\text{C}\{^1\text{H}\}$  (B),  $^1\text{H}$ - $^1\text{H}$  COSY (C) and  $^1\text{H}$ - $^{13}\text{C}$  HSQC (D) NMR spectra of complex **Ru(BAC)** in chloroform- $d$  at 298 K.

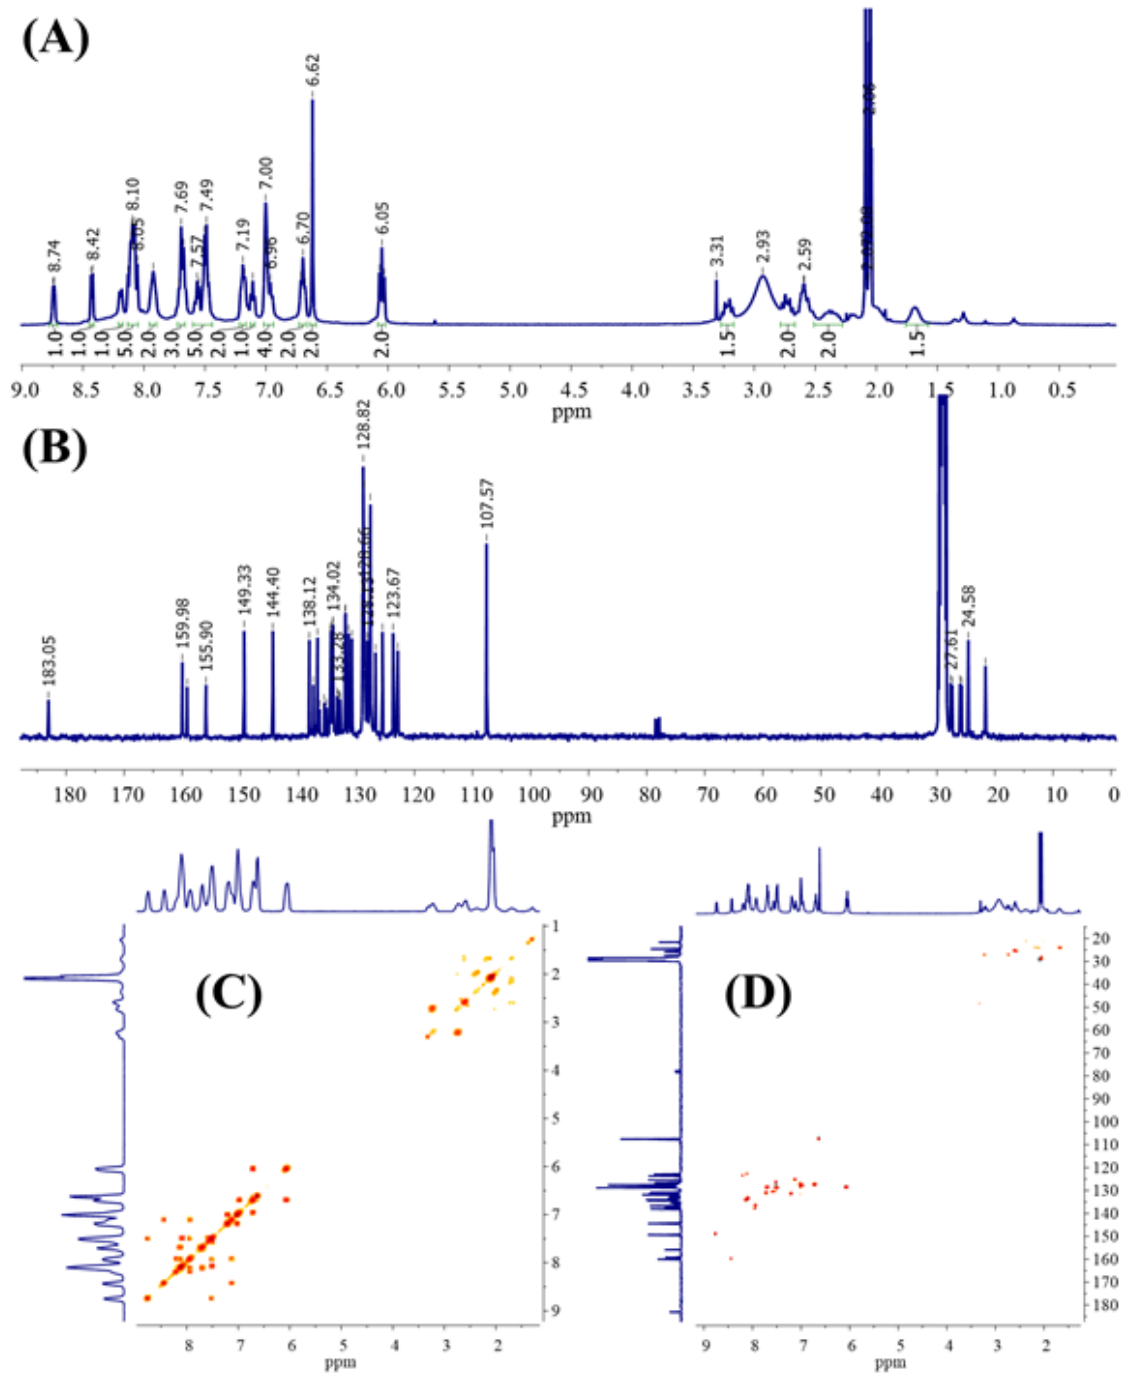

**Figure 2S:**  $^1\text{H}$  (A),  $^{13}\text{C}\{^1\text{H}\}$  (B),  $^1\text{H}$ - $^1\text{H}$  COSY (C) and  $^1\text{H}$ - $^{13}\text{C}$  HSQC (D) NMR spectra of complex **Ru(GAC)** in chloroform- $d$  at 298 K.

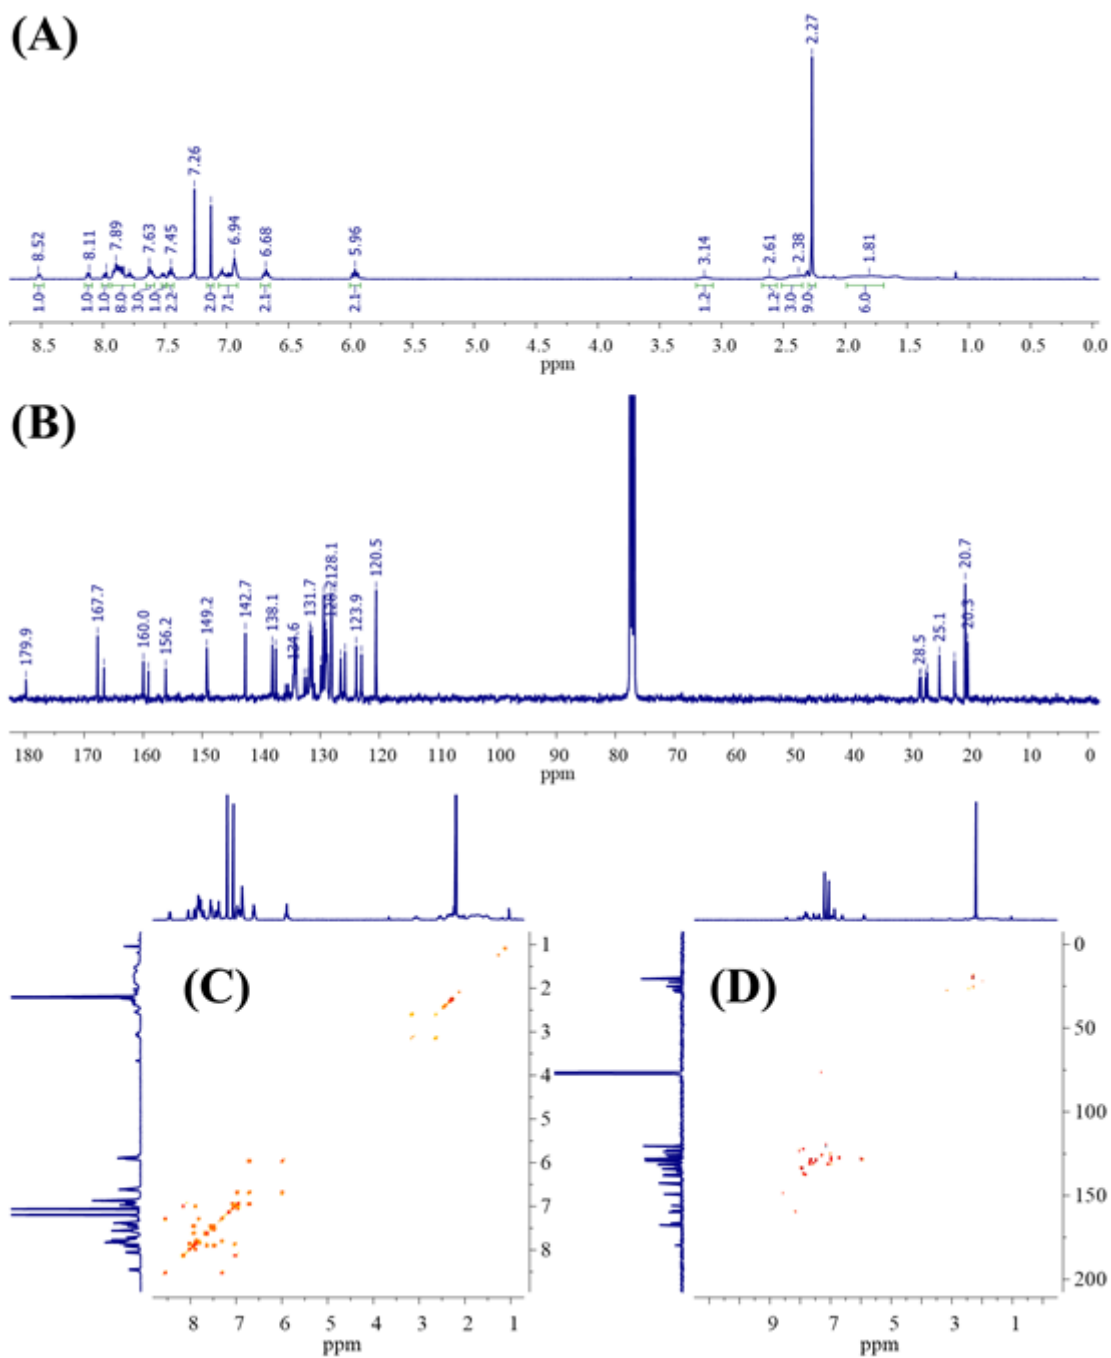

**Figure 3S:**  $^1\text{H}$  (A),  $^{13}\text{C}\{^1\text{H}\}$  (B),  $^1\text{H}$ - $^1\text{H}$  COSY (C) and  $^1\text{H}$ - $^{13}\text{C}$  HSQC (D) NMR spectra of complex **Ru(EGA)** in chloroform- $d$  at 298 K.

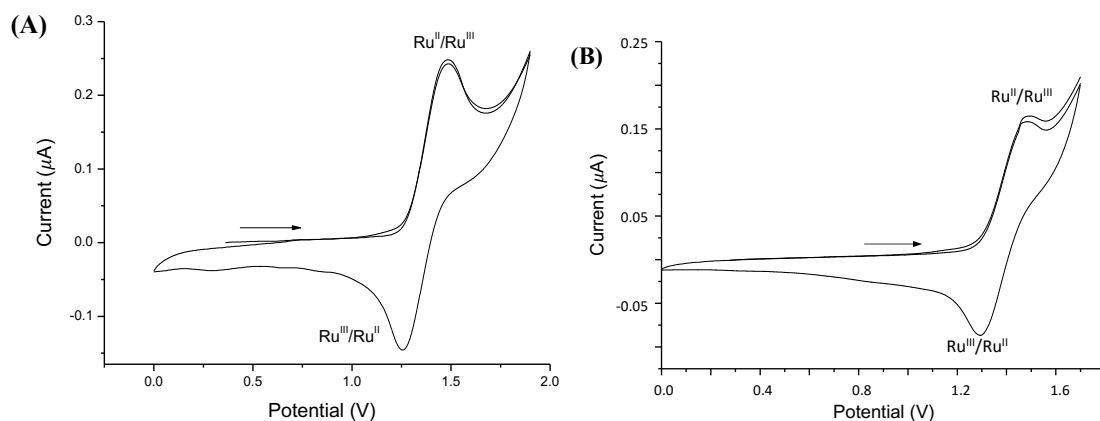

**Figure 4S:** Cyclic voltammograms for complexes (A) Ru(BAC), (B) Ru(EGA) in Pt disc electrode (0.1 M PTBA,  $100 \text{ mV s}^{-1}$ , reference electrode: Ag/AgCl).

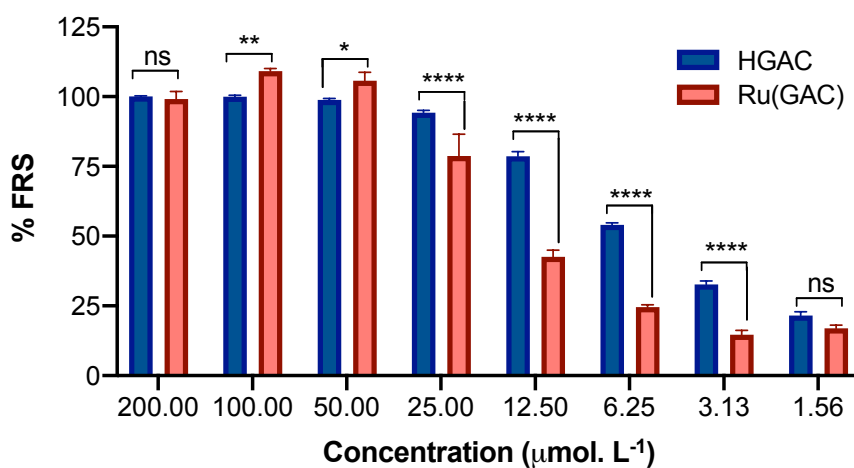

**Figure 5S:** % FRS of the ligand HGAC and the complex Ru(GAC) after 30 minutes of reaction. Data represents mean  $\pm$  SD from three independent assays in triplicate. Significance at the \* $p < 0.05$ ; \*\* $p < 0.01$  and \*\*\*\* $p < 0.0001$  levels using 2way ANOVA and Sidak's test.

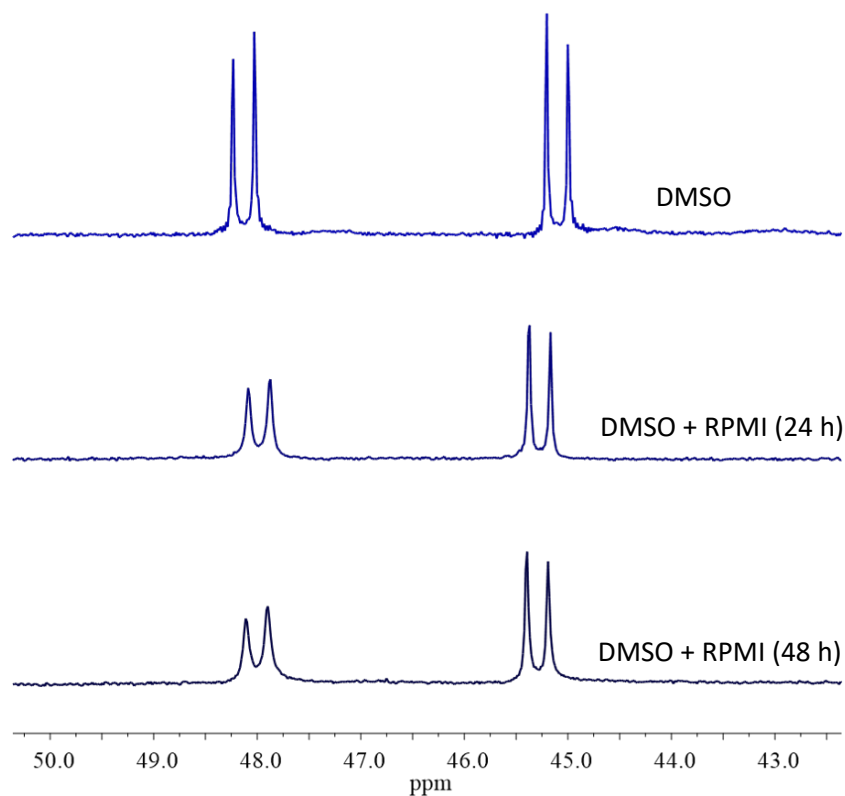

**Figure 6S:**  $^{31}\text{P}\{^1\text{H}\}$  NMR spectra of stability studies of complex **Ru(GAC)** under physiological conditions DMSO/RPMI medium (2:1).

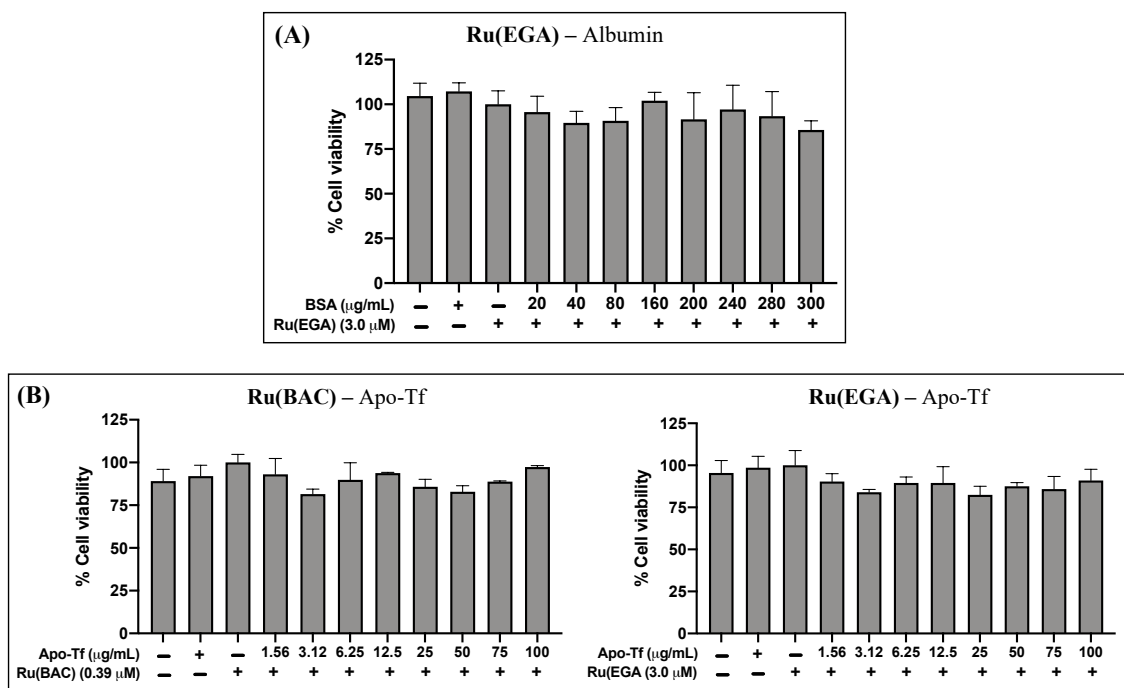

**Figure 7S:** Transport of ruthenium complex by albumin and transferrin in MDA-MB-231. The complexes, with fixed concentrations, were incubated with increasing concentrations of bovine serum albumin (A) or apo-Tf (B) for 48 h. Viable cells were estimated by MTT assay, and results were compared to cells treated with the complexes but in the absence of the proteins. Data represents mean  $\pm$  SD from two independent assays in triplicate. Significance at the \* $p < 0.05$ ; \*\* $p < 0.01$ ; \*\*\* $p < 0.001$  and \*\*\*\* $p < 0.0001$  levels using ANOVA and Dunnet's test.
